# Supplementary material
Source: MDPI journal article supplement (https://www.mdpi.com/2071-1050/14/4/2089)
Supplement: s1 [file s1 › sustainability-1546392-supplementary.pdf]

## Review

# An Analysis of the Worldwide Research on the Socio-cultural Valuation of Forest Ecosystem Services

Juan F. Velasco-Muñoz \*, José A. Aznar-Sánchez, Marina Schoenemann and Belén López-Felices

Research Centre on Mediterranean Intensive Agrosystems and Agrifood Biotechnology (CIAIMBITAL), Department of Economy and Business, University of Almería, 04120 Almería, Spain; jaznar@ual.es (J.A.A.-S.); ms665@inlumine.ual.es (M.S.); blopezfelices@ual.es (B.L.-F.)

\* Correspondence: jfvelasco@ual.es

## Supplementary Material S1

### Scopus query 1

(TITLE-ABS-KEY (ecosystem AND services) AND TITLE-ABS-KEY (social AND perceptions) AND TITLE-ABS-KEY (stakeholders) AND TITLE-ABS-KEY (forest)) OR (TITLE-ABS-KEY ("socio-cultural valuation" OR "socio-cultural assess\*" OR "social valuation" OR "social perception" OR "social assess\*" OR "cultural valuation" OR "cultural assess\*") AND TITLE-ABS-KEY (forest\*) AND TITLE-ABS-KEY ("ecosystem service\*" OR "environmental service\*" OR "ecological service\*"))

### Scopus query 2

(TITLE-ABS-KEY (forest\* OR silvicultur\*) AND TITLE-ABS-KEY ("ecosystem service\*" OR "ecological service\*" OR "environmental service\*") AND TITLE-ABS-KEY (socio-cultural OR "social preference\*" OR "qualitative method" OR "qualitative research" OR "cultural value" OR "cultural valuation" OR "social perception")) AND (LIMIT-TO (DOCTYPE, "ar") OR LIMIT-TO (DOCTYPE, "re"))

### Scopus query 3

(TITLE-ABS-KEY (forest\* OR silvicultur\*) AND TITLE-ABS-KEY ("ecosystem service\*" OR "ecological service\*" OR "environmental service\*") AND TITLE-ABS-KEY ("participant observation" OR "social media" OR "free list\*" OR "discourse analysis" OR "photo elicitation" OR "Q method" OR "participat\* mapping" OR delphi)) AND (EXCLUDE (DOCTYPE, "ch"))

## Supplementary Material S2

## Final sample documents

| Title                                                                                                                                                    | Authors                                                                   | Year of Publication | Journal                                   | Citation |
|----------------------------------------------------------------------------------------------------------------------------------------------------------|---------------------------------------------------------------------------|---------------------|-------------------------------------------|----------|
| Geography of disservices in urban forests: public participation mapping for closing the loop                                                             | Baumeister, C.F., Gerstenberg, T., Plieninger, T., Schraml, U.            | 2022                | Ecosystems and People                     | 0        |
| Perceptions of ecosystem services: A comparison between sacred and non-sacred forests in central Benin (West Africa)                                     | Djagoun, C.A.M.S., Zanvo, S., Padonou, E.A., Sogbohossou, E., Sinsin, B.  | 2022                | Forest Ecology and Management             | 0        |
| Relevance of cultural ecosystem services in nurturing ecological identity values that support restoration and conservation efforts                       | Lee, H., Youn, Y.-C.                                                      | 2022                | Forest Ecology and Management             | 0        |
| A decision making approach for assignment of ecosystem services to forest management units: A case study in northwest Turkey                             | Caglayan, İ., Yeşil, A., Kabak, Ö., Bettinger, P.                         | 2021                | Ecological Indicators                     | 3        |
| A novel ecosystem (dis)service cascade model to navigate sustainability problems and its application in a changing agricultural landscape in Brazil      | Blanco, J., Bellón, B., Barthelemy, L., (...), Souza, F.L., Renaud, P.-C. | 2021                | Sustainability Science                    | 1        |
| Assessing and mapping cultural ecosystem services of an urban forest based on narratives from blog posts                                                 | Kim, J., Son, Y.                                                          | 2021                | Ecological Indicators                     | 1        |
| Assessing the sustainability of traditional agroforestry practices: A case of mamar agroforestry in kupang-indonesia                                     | Ngaji, A.U.K., Baiquni, M., Suryatmojo, H., Haryono, E.                   | 2021                | Forest and Society                        | 0        |
| Beijing resident's preferences of ecosystem services of urban forests                                                                                    | Zhi-Ying, H., Yeo-Chang, Y.                                               | 2021                | Forests                                   | 2        |
| Community-based importance and quantification of ecosystem services, disservices, drivers, and neotropical dry forests in a rural colombian municipality | Tovar Tique, Y.P., Escobedo, F.J., Clerici, N.                            | 2021                | Forests                                   | 1        |
| Differences in stakeholder perceptions about native forest: implications for developing a restoration program                                            | Castillo, J.A., Smith-Ramírez, C., Claramunt, V.                          | 2021                | Restoration Ecology                       | 3        |
| Distribution and utilization of homestead windbreak Fukugi ( <i>Garcinia subelliptica</i> Merr.) trees: an ethnobotanical approach                       | Chen, B., Akamine, H.                                                     | 2021                | Journal of Ethnobiology and Ethnomedicine | 0        |
| Economic and Ethical Motivations for Forest Restoration and Incentive Payments                                                                           | Kreye, M.M., Adams, D.C., Soto, J.R., Tanner, S., Rimsaite, R.            | 2021                | Society and Natural Resources             | 1        |

| Title                                                                                                                                                                   | Authors                                                                                              | Year of Publication | Journal                                                           | Citation |
|-------------------------------------------------------------------------------------------------------------------------------------------------------------------------|------------------------------------------------------------------------------------------------------|---------------------|-------------------------------------------------------------------|----------|
| Ecosystem services and gender in rural areas of Nicaragua: Different perceptions about the landscape                                                                    | Cifuentes-Espinosa, J.A., Feintrenie, L., Gutiérrez-Montes, I., Sibelet, N.                          | 2021                | Ecosystem Services                                                | 1        |
| Ethnic homestead forests of North-East India revealed as diverse land-use systems                                                                                       | Reang, D., Sahoo, U.K., Giri, K., Hazarika, A., Nath, A.J.                                           | 2021                | Agroforestry Systems                                              | 2        |
| Exploring plural values of ecosystem services: Local peoples' perceptions and implications for protected area management in the atlantic forest of Brazil               | Coelho-Junior, M.G., de Oliveira, A.L., da Silva-Neto, E.C., (...), Perkins, P.E., de Carvalho, A.G. | 2021                | Sustainability (Switzerland)                                      | 1        |
| Exploring the influencing factors of the recreational utilization and evaluation of urban ecological protection green belts for urban renewal: A case study in Shanghai | Zhao, W., Wang, Y., Chen, D., Wang, L., Tang, X.                                                     | 2021                | International Journal of Environmental Research and Public Health | 0        |
| Forest-related culture and contribution to sustainable development in the northern mountain region in Vietnam                                                           | Ngo, T.T.H., Nguyen, T.P.M., Duong, T.H., Ly, T.H.                                                   | 2021                | Forest and Society                                                | 1        |
| High public appreciation for the cultural ecosystem services of urban and peri-urban forests during the COVID-19 pandemic                                               | Beckmann-Wübbelt, A., Fricke, A., Sebesvari, Z., (...), Fröhlich, K., Saha, S.                       | 2021                | Sustainable Cities and Society                                    | 2        |
| How integrating 'socio-cultural values' into ecosystem services evaluations can give meaning to value indicators                                                        | Breyne, J., Dufrêne, M., Maréchal, K.                                                                | 2021                | Ecosystem Services                                                | 3        |
| Indigenous practices of ecosystem management in a changing climate: Prospects for ecosystem-based adaptation                                                            | Chanza, N., Musakwa, W.                                                                              | 2021                | Environmental Science and Policy                                  | 0        |
| Landowners' Socio-Cultural Valuation of Ecosystem Services Provided by Trees in Costa Rican Agricultural Landscapes                                                     | Leary, J., Grimm, K., Aslan, C., (...), Frey, S., Bath-Rosenfeld, R.                                 | 2021                | Environmental Management                                          | 1        |
| Mapping and assessing ecosystems and their services: a comparative approach to ecosystem service supply in Suriname and French Guiana                                   | Sieber, I.M., Campagne, C.S., Villien, C., Burkhard, B.                                              | 2021                | Ecosystems and People                                             | 1        |
| On the mismatches between the monetary and social values of air purification in the colombian andean region: A case study                                               | Suarez, A., Ruiz-Agudelo, C., Castro-Escobar, E., Flórez-Yepes, G.Y., Vargas-Marín, L.A.             | 2021                | Forests                                                           | 0        |
| Outdoor recreation and nature's contribution to well-being in a pandemic situation - Case Turku, Finland                                                                | Fagerholm, N., Eilola, S., Arki, V.                                                                  | 2021                | Urban Forestry and Urban Greening                                 | 2        |

| Title                                                                                                                                                            | Authors                                                                           | Year of Publication | Journal                           | Citation |
|------------------------------------------------------------------------------------------------------------------------------------------------------------------|-----------------------------------------------------------------------------------|---------------------|-----------------------------------|----------|
| Public perception of forest ecosystem services in Taiwan                                                                                                         | Lin, J.-C., Chiou, C.-R., Chan, W.-H., Wu, M.-S.                                  | 2021                | Journal of Forest Research        | 1        |
| Spatial distribution and perceived drivers of provisioning service values across an East African montane forest landscape                                        | Miller, E.F., Doolittle, A.A., Cerutti, P.O., (...), Ashton, M.S., Mwangi, E.     | 2021                | Landscape and Urban Planning      | 0        |
| Stakeholders' perception towards ecosystem services provided by forests: Comparison among three Balkans countries                                                | Crivellaro, M., Camin, M., Colle, G., Bezzi, M., Paletto, A.                      | 2021                | Annals of Silvicultural Research  | 0        |
| Using Flickr data and selected environmental characteristics to analyse the temporal and spatial distribution of activities in forest areas                      | Ciesielski, M., Stereńczak, K.                                                    | 2021                | Forest Policy and Economics       | 0        |
| Using social media to assess recreation across urban green spaces in times of abrupt change                                                                      | Grzyb, T., Kulczyk, S., Derek, M., Woźniak, E.                                    | 2021                | Ecosystem Services                | 2        |
| Winners and losers in energy transition: Study case of wood biomass power-plants implementation in france                                                        | Sansilvestri, R., Cordier, M., Lescuyer, T.                                       | 2021                | Forests                           | 1        |
| A deliberative research approach to valuing agro-ecosystem services in a worked landscape                                                                        | Shipley, N.J., Johnson, D.N., van Riper, C.J., (...), Stein, J.A., Shew, J.J.     | 2020                | Ecosystem Services                | 6        |
| A social assessment of forest resource based on stakeholders' perception: an application in three Balkans rural areas                                            | Marta, C., Maurizio, C., Giacomo, C., Marco, B., Alessandro, P.                   | 2020                | Journal of Forest Research        | 3        |
| Ecosystem services from mountain forests: Local communities' views in Kibira National Park, Burundi                                                              | Ndayizeye, G., Imani, G., Nkengurutse, J., (...), Niyongabo, F., Cuni-Sanchez, A. | 2020                | Ecosystem Services                | 6        |
| Evidence that cultural food practices of Adi women in Arunachal Pradesh, India, improve social-ecological resilience: insights for Sustainable Development Goals | Singh, R.K., Kumar, A., Singh, A., Singhal, P.                                    | 2020                | Ecological Processes              | 5        |
| Exploring cultural ecosystem service hotspots: Linking multiple urban forest features with public participation mapping data                                     | Baumeister, C.F., Gerstenberg, T., Plieninger, T., Schraml, U.                    | 2020                | Urban Forestry and Urban Greening | 14       |
| Forest protection unifies, silviculture divides: A sociological analysis of local stakeholders' voices after coppicing in the marganai forest (Sardinia, Italy)  | Branca, G., Piredda, I., Scotti, R., (...), Schwarz, M., Giadrossich, F.          | 2020                | Forests                           | 1        |
| How farmers feel about trees: Perceptions of ecosystem services and disservices associated with rural forests in southwestern France                             | Blanco, J., Sourdril, A., Deconchat, M., (...), San Cristobal, M., Andrieu, E.    | 2020                | Ecosystem Services                | 9        |

| Title                                                                                                                                                                                                                                                                          | Authors                                                                           | Year of Publication | Journal                                   | Citation |
|--------------------------------------------------------------------------------------------------------------------------------------------------------------------------------------------------------------------------------------------------------------------------------|-----------------------------------------------------------------------------------|---------------------|-------------------------------------------|----------|
| Integrating preferences and social values for ecosystem services in local ecological management: A framework applied in Xiaojiang Basin Yunnan province, China                                                                                                                 | Zhang, W., Yu, Y., Wu, X., Pereira, P., Lucas Borja, M.E.                         | 2020                | Land Use Policy                           | 12       |
| Mapping cultural ecosystem services enables better informed nature protection and landscape management                                                                                                                                                                         | Vrbičanová, G., Kaisová, D., Močko, M., Petrovič, F., Mederly, P.                 | 2020                | Sustainability (Switzerland)              | 11       |
| Mapping heritage ecosystem services in ecological restoration areas: A case study from the East Cascades, Washington                                                                                                                                                           | Helmer, M., Lipton, J., Snitker, G., (...), Triplett, M., Cervený, L.             | 2020                | Journal of Outdoor Recreation and Tourism | 1        |
| Participatory community-based monitoring of water in the southwest periphery of Mexico City   [Monitoreo comunitario participativo del agua en la periferia suroeste de la Ciudad de México]                                                                                   | Perevochtchikova, M., Sandoval-Romero, G.E.                                       | 2020                | Investigaciones Geográficas               | 1        |
| Participatory mapping of cultural ecosystem services in madrid: Insights for landscape planning                                                                                                                                                                                | García-Díez, V., García-Llorente, M., González, J.A.                              | 2020                | Land                                      | 7        |
| Perception of ecosystem services and disservices on a peri-urban communal forest: Are landowners' and visitors' perspectives dissimilar?                                                                                                                                       | Rodríguez-Morales, B., Rocas-Díaz, J.V., Kelemen, E., Pataki, G., Díaz-Varela, E. | 2020                | Ecosystem Services                        | 8        |
| Phytodiversity and ecosystem services associated with avenue trees planted along managed roadways in the city of grand-popo in Benin   [Phytodiversité et services écosystémiques associés aux plantations d'alignement des rues aménagées de la ville de grand-popo au Bénin] | Osseni, A.A., Gbesso, G.H.F., Nansi, K.M., Tente, A.B.H.                          | 2020                | Bois et Forêts des Tropiques              | 0        |
| Preferences for ecosystem services provided by urban forests in South Korea                                                                                                                                                                                                    | Jang-Hwan, J., So-Hee, P., JaChoon, K., (...), Lim, E.M., Yeo-Chang, Y.           | 2020                | Forest Science and Technology             | 3        |
| Restoring the forest revives our culture: Ecosystem services and values for ecological restoration across the rural-urban nexus in South Africa                                                                                                                                | Constant, N.L., Taylor, P.J.                                                      | 2020                | Forest Policy and Economics               | 12       |
| Social valuation of mediterranean cultural landscapes: Exploring landscape preferences and ecosystem services perceptions through a visual approach                                                                                                                            | Bidegain, Í., López-Santiago, C.A., González, J.A., (...), Ravera, F., Cerda, C.  | 2020                | Land                                      | 2        |
| Societal Recognition of Ecosystem Service Flows from Red Panda Habitats in Western Nepal                                                                                                                                                                                       | Bhatta, M., Zander, K.K., Austin, B.J., Garnett, S.T.                             | 2020                | Mountain Research and Development         | 2        |

| Title                                                                                                                                                                                                                                                 | Authors                                                                           | Year of Publication | Journal                                                           | Citation |
|-------------------------------------------------------------------------------------------------------------------------------------------------------------------------------------------------------------------------------------------------------|-----------------------------------------------------------------------------------|---------------------|-------------------------------------------------------------------|----------|
| Socio-cultural valuation of Polish agricultural landscape components by farmers and its consequences                                                                                                                                                  | Włodarczyk-Marciniak, R., Frankiewicz, P., Krauze, K.                             | 2020                | Journal of Rural Studies                                          | 9        |
| Spatial literacy influences stakeholder's recognition and mapping of peri-urban and urban ecosystem services                                                                                                                                          | Escobedo, F.J., Bottin, M., Cala, D., Sandoval Montoya, D.L.                      | 2020                | Urban Ecosystems                                                  | 3        |
| Spontaneous forest regrowth in South-West Europe: Consequences for nature's contributions to people                                                                                                                                                   | Martín-Forés, I., Magro, S., Bravo-Oviedo, A., (...), Hampe, A., Valladares, F.   | 2020                | People and Nature                                                 | 6        |
| The forest stakeholders' perception towards the NATURA 2000 network in the Czech Republic                                                                                                                                                             | Schneider, J., Ruda, A., Kalasová, Z., Paletto, A.                                | 2020                | Forests                                                           | 4        |
| Unsustainable trade-offs: provisioning ecosystem services in rapidly changing Likangala River catchment in southern Malawi                                                                                                                            | Pullanikkatil, D., Mograbi, P.J., Palamuleni, L., Ruhiiga, T., Shackleton, C.     | 2020                | Environment, Development and Sustainability                       | 5        |
| Urban forest construction based on ecosystem service function improvement in warm temperate semi-humid areas   [基于生态系统服务功能提升的暖温带半湿润地区城市森林营建研究]                                                                                                        | Ge, Y., Xin, B., Li, X.                                                           | 2020                | Beijing Linze Daxue Xuebao/Journal of Beijing Forestry University | 1        |
| Using a combination of Q-methodology and survey-based approach for assessing forest ecosystem services of Five Finger Mountains in Northern Cyprus                                                                                                    | Ciftcioglu, G.C.                                                                  | 2020                | Sustainability Science                                            | 3        |
| Agricultural modernization and socio-cultural valuation of ecosystem services in mayan landscapes of southeastern Mexico   [Modernización agrícola y valoración sociocultural de los servicios ecosistémicos en paisajes mayas del sureste de México] | Alpuche-álvarez, Y.A., Ochoa-Gaona, S., Monzón-Alvarado, C.M., Cortina-Villar, S. | 2019                | Ecologia Austral                                                  | 0        |
| Big data and evaluation of cultural ecosystem services: An analysis based on geotagged photographs from social media in tuscan forest (Italy)                                                                                                         | Bernetti, I., Chirici, G., Sacchelli, S.                                          | 2019                | IForest                                                           | 12       |
| Change from agricultural to touristic use: Effects on the aesthetic value of landscapes over the last 150 years                                                                                                                                       | Schirpke, U., Altzinger, A., Leitinger, G., Tasser, E.                            | 2019                | Landscape and Urban Planning                                      | 28       |
| Combining remote sensing techniques and participatory mapping to understand the relations between forest degradation and ecosystems services in a tropical rainforest                                                                                 | Delgado-Aguilar, M.J., Hinojosa, L., Schmitt, C.B.                                | 2019                | Applied Geography                                                 | 9        |

| Title                                                                                                                                                                      | Authors                                                                         | Year of Publication | Journal                       | Citation |
|----------------------------------------------------------------------------------------------------------------------------------------------------------------------------|---------------------------------------------------------------------------------|---------------------|-------------------------------|----------|
| Earth observation and social media: Evaluating the spatiotemporal contribution of non-native trees to cultural ecosystem services                                          | Vaz, A.S., Gonçalves, J.F., Pereira, P., (...), Vicente, J.R., Honrado, J.P.    | 2019                | Remote Sensing of Environment | 18       |
| Forest Ecosystem Services and Local Communities: Towards a Possible Solution to Reduce Forest Dependence in Bach Ma National Park, Vietnam                                 | Hong, N.T., Saizen, I.                                                          | 2019                | Human Ecology                 | 3        |
| Local perspectives on ecosystem service trade-offs in a forest frontier landscape in Myanmar                                                                               | Feurer, M., Heinimann, A., Schneider, F., (...), Myint, W., Zaehring, J.G.      | 2019                | Land                          | 14       |
| Local users and other stakeholders' perceptions of the identification and prioritization of ecosystem services in fragile mountains: A case study of Chure region of Nepal | Acharya, R.P., Maraseni, T.N., Cockfield, G.                                    | 2019                | Forests                       | 9        |
| Perceived ecosystem services (ES) and ecosystem disservices (EDS) from trees: insights from three case studies in Brazil and France                                        | Teixeira, F.Z., Bachi, L., Blanco, J., (...), Welle, I., Carvalho-Ribeiro, S.M. | 2019                | Landscape Ecology             | 16       |
| Perceptions of ecosystem services provided by tropical forests to local populations in Cameroon                                                                            | Lhoest, S., Dufrene, M., Vermeulen, C., (...), Doucet, J.-L., Fayolle, A.       | 2019                | Ecosystem Services            | 11       |
| Quantifying cultural ecosystem services: Disentangling the effects of management from landscape features                                                                   | Tew, E.R., Simmons, B.I., Sutherland, W.J.                                      | 2019                | People and Nature             | 13       |
| Social Perceptions of Forest Ecosystem Services in the Democratic Republic of Congo                                                                                        | Cuni-Sanchez, A., Imani, G., Bulonvu, F., (...), Klein, J.A., Marchant, R.      | 2019                | Human Ecology                 | 11       |
| Social valuation of regulating and cultural ecosystem services of Arroceros Forest Park: A man-made forest in the city of Manila, Philippines                              | Lagbas, A.J.                                                                    | 2019                | Journal of Urban Management   | 7        |
| Socio-cultural values of ecosystem services from Oak Forests in the Eastern Himalaya                                                                                       | Dorji, T., Brookes, J.D., Facelli, J.M., (...), Chhetri, Y.R., Baral, H.        | 2019                | Sustainability (Switzerland)  | 8        |
| The importance of livelihood strategy and ethnicity in forest ecosystem services' perceptions by local communities in north-western Cameroon                               | Cuni-Sanchez, A., Ngute, A.S.K., Sonké, B., (...), Klein, J.A., Marchant, R.    | 2019                | Ecosystem Services            | 12       |
| Understanding citizen perceptions of the Eastern Hills of Bogota: a participatory place-based ecosystem service assessment                                                 | Robson, E., van Kerkhoff, L., Cork, S.                                          | 2019                | Urban Ecosystems              | 5        |

| Title                                                                                                                                                                                                      | Authors                                                                         | Year of Publication | Journal                       | Citation |
|------------------------------------------------------------------------------------------------------------------------------------------------------------------------------------------------------------|---------------------------------------------------------------------------------|---------------------|-------------------------------|----------|
| Valuation of ecosystem services by stakeholders operating at different levels: insights from the Portuguese cultural montado landscape                                                                     | do Rosário, I.T., Rebelo, R., Caser, U., Vasconcelos, L., Santos-Reis, M.       | 2019                | Regional Environmental Change | 5        |
| Values held by Swedish primary school students towards forest ecosystems and the relevance for a nature's contributions to people approach                                                                 | Goodwin, S., Brogaard, S., Krause, T.                                           | 2019                | Ecosystems and People         | 3        |
| A framework for integrating systematic stakeholder analysis in ecosystem services research: Stakeholder mapping for forest ecosystem services in the UK                                                    | Raum, S.                                                                        | 2018                | Ecosystem Services            | 56       |
| An integrated approach to valuation and tradeoff analysis of ecosystem services for national forest decision-making                                                                                        | Armatas, C.A., Campbell, R.M., Watson, A.E., (...), Christensen, N., Venn, T.J. | 2018                | Ecosystem Services            | 18       |
| Applying the Delphi method to assess impacts of forest management on biodiversity and habitat preservation                                                                                                 | Filyushkina, A., Strange, N., Löf, M., Ezebilo, E.E., Boman, M.                 | 2018                | Forest Ecology and Management | 26       |
| Assessing social values of ecosystem services in the Phewa Lake Watershed, Nepal                                                                                                                           | Paudyal, K., Baral, H., Keenan, R.J.                                            | 2018                | Forest Policy and Economics   | 25       |
| Attractiveness of running events in forests of Poland and Czech Republic   [Atrakcyjność imprez biegowych w lasach Polski i Czech]                                                                         | Janeczko, E., Fialova, J., Tomusiak, R., (...), Budnicka-Kosior, J., Kwaśny, Ł. | 2018                | Sylvan                        | 2        |
| Bringing multiple values to the table: Assessing future land-use and climate change in North Kona, Hawai'i                                                                                                 | Bremer, L.L., Mandle, L., Trauernicht, C., (...), Chock, P., Ticktin, T.        | 2018                | Ecology and Society           | 14       |
| Connecting plant traits and social perceptions in riparian systems: Ecosystem services as indicators of thresholds in social-ecohydrological systems                                                       | Hough, M., Pavao-Zuckerman, M.A., Scott, C.A.                                   | 2018                | Journal of Hydrology          | 5        |
| Contributions of human behavior study to the research and management of rural ecosystems and landscapes   [Aproximaciones al estudio del comportamiento de los productores agropecuarios en el Chaco Seco] | Mastrangelo, M.E.                                                               | 2018                | Ecologia Austral              | 5        |
| Farmers' perceptions on cultivation and the impacts of climate change on goods and services provided by <i>Garcinia kola</i> in Nigeria                                                                    | Agwu, O.P., Bakayoko, A., Jimoh, S.O., Stefan, P.                               | 2018                | Ecological Processes          | 4        |
| Local perceptions of tree diversity, resource utilisation and ecosystem services provision at the periphery of Gonarezhou National Park, Zimbabwe                                                          | Mero Dowo, G., Kativu, S., de Garine-Wichatitsky, M.                            | 2018                | Forests Trees and Livelihoods | 3        |
| Mapping recreation of FRIM via social media                                                                                                                                                                | Adnan, N.                                                                       | 2018                | ASM Science Journal           | 0        |

| Title                                                                                                                                                                                           | Authors                                                                                          | Year of Publication | Journal                             | Citation |
|-------------------------------------------------------------------------------------------------------------------------------------------------------------------------------------------------|--------------------------------------------------------------------------------------------------|---------------------|-------------------------------------|----------|
| Perceptions of cultural ecosystem services in urban green spaces: A case study in Gwacheon, Republic of Korea                                                                                   | Ko, H., Son, Y.                                                                                  | 2018                | Ecological Indicators               | 37       |
| Public perceptions of ecosystem services and preferences for design scenarios of the flooded bank along the Three Gorges Reservoir: Implications for sustainable management of novel ecosystems | Chen, C., Wang, Y., Jia, J.                                                                      | 2018                | Urban Forestry and Urban Greening   | 7        |
| Qualitative assessment of forest ecosystem services: The stakeholders' point of view in support of landscape planning                                                                           | De Meo, I., Cantiani, M.G., Ferretti, F., Paletto, A.                                            | 2018                | Forests                             | 12       |
| Running events in Polish forests in the opinion of their participants                                                                                                                           | Janeczko, E., Tomusiak, R., Woznicka, M., Janeczko, K.                                           | 2018                | Folia Forestalia Polonica, Series A | 1        |
| Social-ecological innovation in remote mountain areas: Adaptive responses of forest-dependent communities to the challenges of a changing world                                                 | Melnykovich, M., Nijnik, M., Soloviy, I., (...), Sarkki, S., Bihun, Y.                           | 2018                | Science of the Total Environment    | 39       |
| Unraveling heterogeneity in the importance of ecosystem services: Individual views of smallholders                                                                                              | Tauro, A., Gómez-Baggethun, E., García-Frapolli, E., Chavero, E.L., Balvanera, P.                | 2018                | Ecology and Society                 | 18       |
| Using remote sensing and traditional ecological knowledge (TEK) to understand mangrove change on the Maroochy River, Queensland, Australia                                                      | Brown, M.I., Pearce, T., Leon, J., Sidle, R., Wilson, R.                                         | 2018                | Applied Geography                   | 20       |
| Community mapping of ecosystem services in tropical rainforest of Ecuador                                                                                                                       | Delgado-Aguilar, M.J., Konold, W., Schmitt, C.B.                                                 | 2017                | Ecological Indicators               | 23       |
| Dependence of riparian communities on ecosystem services in Northern Ghana                                                                                                                      | Mul, M., Pettinotti, L., Amonoo, N.A., Bekoe-Obeng, E., Obuobie, E.                              | 2017                | IWMI Working Papers                 | 3        |
| Ecosystem service importance and use vary with socio-environmental factors: A study from household-surveys in local communities of South Africa                                                 | Mensah, S., Veldtman, R., Assogbadjo, A.E., (...), Glèlè Ka-kaï, R., Seifert, T.                 | 2017                | Ecosystem Services                  | 46       |
| Forest company dependencies and impacts on ecosystem services: Expert perceptions from China                                                                                                    | Wan, M., D'Amato, D., Toppinen, A., Rekola, M.                                                   | 2017                | Forests                             | 2        |
| Future impacts of drivers of change on wetland ecosystem services in Colombia                                                                                                                   | Ricaurte, L.F., Olaya-Rodríguez, M.H., Cepeda-Valencia, J., (...), Max Finlayson, C., Palomo, I. | 2017                | Global Environmental Change         | 47       |
| Integrating ecosystem services and human well-being into management practices: Insights from a mountain-basin area, China                                                                       | Wang, B., Tang, H., Xu, Y.                                                                       | 2017                | Ecosystem Services                  | 29       |

| Title                                                                                                                                                                                                                  | Authors                                                                               | Year of Publication | Journal                                                                         | Citation |
|------------------------------------------------------------------------------------------------------------------------------------------------------------------------------------------------------------------------|---------------------------------------------------------------------------------------|---------------------|---------------------------------------------------------------------------------|----------|
| Methodological considerations & their application for evaluation of benefits from the conversion of even-Age secondary Norway spruce stands into mixed uneven-Aged woodlands with a focus on the Ukrainian Carpathians | Zahvoyska, L., Pelyukh, O., Maksymiv, L.                                              | 2017                | Austrian Journal of Forest Science                                              | 7        |
| Neglected ecosystem services: Highlighting the socio-cultural perception of mangroves in decision-making processes                                                                                                     | Queiroz, L.D.S., Rossi, S., Calvet-Mir, L., (...), Salvà-Prat, J., Meireles, A.J.D.A. | 2017                | Ecosystem Services                                                              | 62       |
| Social Perceptions of Biodiversity and Ecosystem Services in the Ecuadorian Amazon                                                                                                                                     | Caballero-Serrano, V., Alday, J.G., Amigo, J., (...), McLaren, B., Onaindia, M.       | 2017                | Human Ecology                                                                   | 15       |
| Species richness alone does not predict cultural ecosystem service value                                                                                                                                               | Graves, R.A., Pearson, S.M., Turner, M.G.                                             | 2017                | Proceedings of the National Academy of Sciences of the United States of America | 46       |
| Stakeholder perspectives of wood-pasture ecosystem services: A case study from Iberian dehesas                                                                                                                         | Garrido, P., Elbakidze, M., Angelstam, P., (...), Pulido, F., Moreno, G.              | 2017                | Land Use Policy                                                                 | 56       |
| Testing socio-cultural valuation methods of ecosystem services to explain land use preferences                                                                                                                         | Schmidt, K., Walz, A., Martín-López, B., Sachse, R.                                   | 2017                | Ecosystem Services                                                              | 39       |
| Tourism, landscapes and cultural ecosystem services: a new research tool                                                                                                                                               | Smith, M., Ram, Y.                                                                    | 2017                | Tourism Recreation Research                                                     | 20       |
| Assessing linkages between ecosystem services, land-use and well-being in an agroforestry landscape using public participation GIS                                                                                     | Fagerholm, N., Oteros-Rozas, E., Raymond, C.M., (...), Moreno, G., Plieninger, T.     | 2016                | Applied Geography                                                               | 71       |
| Assessing the recreation value of urban woodland using the ecosystem service approach in two forests in the munich metropolitan region                                                                                 | Lupp, G., Förster, B., Kantelberg, V., (...), Koch, M., Pauleit, S.                   | 2016                | Sustainability (Switzerland)                                                    | 19       |
| Cultural valuation and biodiversity conservation in the Upper Guinea forest, West Africa                                                                                                                               | Fraser, J.A., Diabaté, M., Narmah, W., (...), de Foresta, H., Junqueira, A.B.         | 2016                | Ecology and Society                                                             | 12       |
| Ethnic and locational differences in ecosystem service values: Insights from the communities in forest islands in the desert                                                                                           | Cuni-Sanchez, A., Pfeifer, M., Marchant, R., Burgess, N.D.                            | 2016                | Ecosystem Services                                                              | 40       |

| Title                                                                                                                                                                                                           | Authors                                                                                | Year of Publication | Journal                                  | Citation |
|-----------------------------------------------------------------------------------------------------------------------------------------------------------------------------------------------------------------|----------------------------------------------------------------------------------------|---------------------|------------------------------------------|----------|
| Exploring socio-cultural values of ecosystem service categories in the Central Alps: the influence of socio-demographic factors and landscape type                                                              | Zoderer, B.M., Lupo Stanghellini, P.S., Tasser, E., (...), Wieser, H., Tappeiner, U.   | 2016                | Regional Environmental Change            | 47       |
| Exploring the linkages between multifunctional forestry goals and the legacy of spruce plantations in Scotland                                                                                                  | Nijnik, M., Nijnik, A., Brown, I.                                                      | 2016                | Canadian Journal of Forest Research      | 14       |
| Factors influencing the perception of ecosystem services in Ecuadorian tropical dry forests   [Factores que influyen en la percepción de servicios de los ecosistemas de los bosques secos del sur del Ecuador] | Briceño, J., Iñiguez-Gallardo, V., Ravera, F.                                          | 2016                | Ecosistemas                              | 10       |
| In the eye of the stakeholder: The challenges of governing social forest values                                                                                                                                 | Sténs, A., Bjärstig, T., Nordström, E.-M., (...), Fries, C., Johansson, J.             | 2016                | Ambio                                    | 30       |
| Management of vegetation under electric distribution lines will affect the supply of multiple ecosystem services                                                                                                | Dupras, J., Patry, C., Tittler, R., (...), Alam, M., Messier, C.                       | 2016                | Land Use Policy                          | 13       |
| Mapping social values of ecosystem services: What is behind the map?                                                                                                                                            | Nahuelhual, L., Benra Ochoa, F., Rojas, F., Ignacio Díaz, G., Carmona, A.              | 2016                | Ecology and Society                      | 22       |
| Participatory mapping to identify indigenous community use zones: Implications for conservation planning in southern Suriname                                                                                   | Ramirez-Gomez, S.O.I., Brown, G., Verweij, P.A., Boot, R.                              | 2016                | Journal for Nature Conservation          | 36       |
| Social perception of forest multifunctionality in southern Italy: The case of Calabria Region                                                                                                                   | Pastorella, F., Giacobelli, G., Maesano, M., (...), Pellicone, G., Mugnozza, G.S.      | 2016                | Journal of Forest Science                | 10       |
| Sociocultural valuation of ecosystem services to improve protected area management: a multi-method approach applied to Catalonia, Spain                                                                         | Maestre-Andrés, S., Calvet-Mir, L., van den Bergh, J.C.J.M.                            | 2016                | Regional Environmental Change            | 24       |
| Spatial and temporal dynamics and value of nature-based recreation, estimated via social media                                                                                                                  | Sonter, L.J., Watson, K.B., Wood, S.A., Ricketts, T.H.                                 | 2016                | PLoS ONE                                 | 94       |
| Spatial patterns of cultural ecosystem services provision in Southern Patagonia                                                                                                                                 | Martínez Pastur, G., Peri, P.L., Lencinas, M.V., García-Llorente, M., Martín-López, B. | 2016                | Landscape Ecology                        | 122      |
| The forest gives us health: Relationships between environmental health and human health in Maroon communities of Santa Catarina   [Compreendendo a                                                              | Zank, S., Ávila, J.V.C., Hanazaki, N.                                                  | 2016                | Revista Brasileira de Plantas Medicinais | 8        |

| Title                                                                                                                                                                                                                                  | Authors                                                                       | Year of Publication | Journal                                                                          | Citation |
|----------------------------------------------------------------------------------------------------------------------------------------------------------------------------------------------------------------------------------------|-------------------------------------------------------------------------------|---------------------|----------------------------------------------------------------------------------|----------|
| relação entre saúde do ambiente e saúde humana em comunidades Quilombolas de Santa Catarina]                                                                                                                                           |                                                                               |                     |                                                                                  |          |
| Assessing community values to support mapping of ecosystem services in the Koshi river basin, Nepal                                                                                                                                    | van Oort, B., Bhatta, L.D., Baral, H., (...), Rucevska, I., Adhikari, R.      | 2015                | Ecosystem Services                                                               | 43       |
| Energy wood from forests—stakeholder perceptions in five European countries                                                                                                                                                            | Peters, D.M., Wirth, K., Böhr, B., (...), Solberg, B., Zadnik Stirn, L.       | 2015                | Energy, Sustainability and Society                                               | 13       |
| Felling ficus: The cultural status of fig trees in a rural assamese community, India                                                                                                                                                   | Cotee-Jones, H.E.W., Whitaker, R.J.                                           | 2015                | Ethnobiology Letters                                                             | 3        |
| Historical and contemporary cultural ecosystem service values in the rapidly urbanizing city state of Singapore                                                                                                                        | Thiagarajah, J., Wong, S.K.M., Richards, D.R., Friess, D.A.                   | 2015                | Ambio                                                                            | 70       |
| Local assessment of changes in water-related ecosystem services and their management: DPASER conceptual model and its application in Taita Hills, Kenya                                                                                | Hohenthal, J., Owidi, E., Minoia, P., Pellikka, P.                            | 2015                | International Journal of Biodiversity Science, Ecosystem Services and Management | 18       |
| Local health practices and the knowledge of medicinal plants in a Brazilian semi-arid region: Environmental benefits to human health                                                                                                   | Zank, S., Peroni, N., de Araújo, E.L., Hanazaki, N.                           | 2015                | Journal of Ethnobiology and Ethnomedicine                                        | 8        |
| Local perception of the ecological services and well-being of the Maya Zone's rainforest from Quintana Roo, Mexico   [Percepción local de los servicios ecológicos y de bienestar de la selva de la zona maya en Quintana Roo, México] | Ramírez, K.D.I., Ibarra, A.M.A.                                               | 2015                | Investigaciones Geográficas                                                      | 7        |
| Participatory assessment and mapping of ecosystem services in a data-poor region: Case study of community-managed forests in central Nepal                                                                                             | Paudyal, K., Baral, H., Burkhard, B., Bhandari, S.P., Keenan, R.J.            | 2015                | Ecosystem Services                                                               | 100      |
| The immersive visualization theater: A new tool for ecosystem assessment and landscape planning                                                                                                                                        | Orenstein, D.E., Zimroni, H., Eizenberg, E.                                   | 2015                | Computers, Environment and Urban Systems                                         | 24       |
| A multi-criteria model for mapping ecosystem services in forested watersheds, southern Chile   [Modelo de análisis espacial multicriterio (AEMC) para el mapeo de servicios ecosistémicos en cuencas forestales del sur de Chile]      | Esse, C., Valdivia, P., Encina-Montoya, F., (...), Guerrero, M., Figueroa, D. | 2014                | Bosque                                                                           | 4        |

| Title                                                                                                                                                              | Authors                                                                  | Year of Publication | Journal                                                            | Citation |
|--------------------------------------------------------------------------------------------------------------------------------------------------------------------|--------------------------------------------------------------------------|---------------------|--------------------------------------------------------------------|----------|
| Analysis of governance systems applied in multifunctional forest management in selected European mountain regions                                                  | Sarvašová, Z., Cienciala, E., Beranová, J., (...), Ficko, A., Pardos, M. | 2014                | Forestry Journal                                                   | 7        |
| Engaging with peri-urban woodlands in england: The contribution to people's health and well-being and implications for future management                           | O'Brien, L., Morris, J., Stewart, A.                                     | 2014                | International Journal of Environmental Research and Public Health  | 26       |
| Ethno-ecological importance of plant biodiversity in mountain ecosystems with special emphasis on indicator species of a Himalayan Valley in the northern Pakistan | Khan, S.M., Page, S., Ahmad, H., Harper, D.                              | 2014                | Ecological Indicators                                              | 35       |
| Identifying forest ecosystem services through socio-ecological bundles: A case study from northern Jordan                                                          | Al-Assaf, A., Nawash, O., Omari, M.                                      | 2014                | International Journal of Sustainable Development and World Ecology | 20       |
| Incorporating cultural ecosystem services into forest management strategies for private landowners: An Illinois case study                                         | Hendee, J.T., Flint, C.G.                                                | 2014                | Forest Science                                                     | 12       |
| Landscape capacity for ecosystem services provision based on expert knowledge and public Perception (case study from the north-west Slovakia)                      | Bezák, P., Bezáková, M.                                                  | 2014                | Ekologia Bratislava                                                | 9        |
| Linkages between landscapes and human well-being: An empirical exploration with short interviews                                                                   | Bieling, C., Plieninger, T., Pirker, H., Vogl, C.R.                      | 2014                | Ecological Economics                                               | 96       |
| Living close to forests enhances people's perception of ecosystem services in a forest-agricultural landscape of West Java, Indonesia                              | Muhamad, D., Okubo, S., Harashina, K., (...), Gunawan, B., Takeuchi, K.  | 2014                | Ecosystem Services                                                 | 84       |
| Local ecosystem service use and assessment vary with socio-ecological conditions: A case of native coffee-forests in southwestern Ethiopia                         | Tadesse, G., Zavaleta, E., Shennan, C., Fitzsimmons, M.                  | 2014                | Human Ecology                                                      | 26       |
| Mapping and assessing multiple ecosystem services in an alpine region: A study in Trentino, Italy                                                                  | Ferrari, M., Geneletti, D.                                               | 2014                | Annali di Botanica                                                 | 5        |
| Prospects for forest-based ecosystem services in forest-coffee mosaics as forest loss continues in southwestern Ethiopia                                           | Tadesse, G., Zavaleta, E., Shennan, C., FitzSimmons, M.                  | 2014                | Applied Geography                                                  | 29       |

| Title                                                                                                                                                                         | Authors                                                                                       | Year of Publication | Journal                                              | Citation |
|-------------------------------------------------------------------------------------------------------------------------------------------------------------------------------|-----------------------------------------------------------------------------------------------|---------------------|------------------------------------------------------|----------|
| Using visual stimuli to explore the social perceptions of ecosystem services in cultural landscapes: The case of transhumance in Mediterranean Spain                          | López-Santiago, C.A., Oteros-Rozas, E., Martín-López, B., (...), Martín, E.G., González, J.A. | 2014                | Ecology and Society                                  | 74       |
| A national approach for mapping and quantifying habitat-based biodiversity metrics across multiple spatial scales                                                             | Boykin, K.G., Kepner, W.G., Bradford, D.F., (...), Neale, A.C., Gergely, K.J.                 | 2013                | Ecological Indicators                                | 26       |
| Environmental Cognitions, Land Change and Social-Ecological Feedbacks: Local Case Studies of Forest Transition in Vietnam                                                     | Meyfroidt, P.                                                                                 | 2013                | Human Ecology                                        | 43       |
| Human influence, regeneration, and conservation of the Gotjawal forests in Jeju Island, Korea                                                                                 | Kang, H.-G., Kim, C.-S., Kim, E.-S.                                                           | 2013                | Journal of Marine and Island Cultures                | 19       |
| Perception and attitudes of local people concerning ecosystem services of culturally protected forests                                                                        | Gao, H., Ouyang, Z., Zheng, H., Bluemling, B.                                                 | 2013                | Shengtai Xuebao/ Acta Ecologica Sinica               | 6        |
| The socio-cultural importance of <i>Mauritia flexuosa</i> palm swamps (aguajales) and implications for multi-use management in two Maijuna communities of the Peruvian Amazon | Gilmore, M.P., Endress, B.A., Horn, C.M.                                                      | 2013                | Journal of Ethnobiology and Ethnomedicine            | 34       |
| An analysis of the relationships between multiple values and physical landscapes at a regional scale using public participation GIS and landscape character classification    | Brown, G., Brabyn, L.                                                                         | 2012                | Landscape and Urban Planning                         | 103      |
| Compliance with sustainable forest management guidelines in three timber concessions in the Venezuelan Guayana: Analysis and implications                                     | Vilanova, E., Ramírez-Angulo, H., Ramírez, G., Torres-Lezama, A.                              | 2012                | Forest Policy and Economics                          | 6        |
| A study of stakeholders' perspectives on multi-functional forests in Europe                                                                                                   | Nijnik, M., Nijnik, A., Lundin, L., Staszewski, T., Postolache, C.                            | 2010                | Forests Trees and Livelihoods                        | 15       |
| Public participation GIS: A new method for use in national forest planning                                                                                                    | Brown, G.G., Reed, P.                                                                         | 2009                | Forest Science                                       | 133      |
| A participatory investigation into multifunctional benefits of indigenous trees in West African savanna farmland                                                              | Stoate, C., Jarju, A.K.                                                                       | 2008                | International Journal of Agricultural Sustainability | 5        |
| Social-ecological hotspots mapping: A spatial approach for identifying coupled social-ecological space                                                                        | Alessa, L.(N.), Kliskey, A.(A.), Brown, G.                                                    | 2008                | Landscape and Urban Planning                         | 259      |

| Title                                                                                                                  | Authors                                                          | Year of Publication | Journal                    | Citation |
|------------------------------------------------------------------------------------------------------------------------|------------------------------------------------------------------|---------------------|----------------------------|----------|
| The relationship between place attachment and landscape values: Toward mapping place attachment                        | Brown, G., Raymond, C.                                           | 2007                | Applied Geography          | 448      |
| The return of ecosystem goods and services in replanted mangrove forests: Perspectives from local communities in Kenya | Rönnbäck, P., Crona, B., Ingwall, L.                             | 2007                | Environmental Conservation | 107      |
| Understanding the interaction of rural people with ecosystems: A case study in a tropical dry forest of Mexico         | Castillo, A., Magaña, A., Pujadas, A., Martínez, L., Godínez, C. | 2005                | Ecosystems                 | 79       |
| Validation of a forest values typology for use in national forest planning                                             | Brown, G., Reed, P.                                              | 2000                | Forest Science             | 174      |

### Supplementary Material S3

*Socio-cultural assessment methodology used in each study*

[illegible]

| Documents                                  | Inter-views | Focus Group | Participatory Mapping | Survey | Online Survey | Participant Observation | Q Method | Photo Elicitation | Discourse Analysis | Free Listing | Social Media | Delphi | Workshop |
|--------------------------------------------|-------------|-------------|-----------------------|--------|---------------|-------------------------|----------|-------------------|--------------------|--------------|--------------|--------|----------|
| Fagerholm et al., 2021                     |             |             | X                     |        |               |                         |          |                   |                    |              |              |        |          |
| Lin et al., 2021                           |             |             |                       |        | X             |                         |          |                   |                    |              |              |        |          |
| Miller et al., 2021                        | X           |             | X                     |        |               |                         |          |                   |                    |              |              |        |          |
| Crivellaro et al., 2021                    | X           |             |                       | X      |               |                         |          |                   |                    |              |              |        |          |
| Ciesielski and Stereńczak, 2021            |             |             |                       |        |               |                         |          |                   |                    |              | X            |        |          |
| Grzyb et al., 2021                         |             |             |                       |        |               |                         |          |                   |                    |              | X            |        |          |
| Sansilvestri et al., 2021                  | X           |             |                       |        |               | X                       |          |                   |                    |              |              |        | X        |
| Shipley et al., 2020                       |             | X           |                       |        |               |                         |          |                   |                    |              |              | X      |          |
| Marta et al., 2020                         |             |             |                       | X      |               |                         |          |                   |                    |              |              |        |          |
| Ndayizeye et al., 2020                     |             | X           |                       |        |               |                         |          |                   |                    |              |              |        |          |
| Singh et al., 2020                         | X           | X           |                       |        |               | X                       |          |                   |                    |              |              |        |          |
| Baumeister et al., 2020                    |             |             | X                     |        |               |                         |          |                   |                    |              |              |        |          |
| Branca et al., 2020                        | X           |             |                       |        |               |                         |          |                   |                    |              |              |        |          |
| Blanco et al., 2020                        | X           |             |                       |        |               |                         |          |                   |                    |              |              |        |          |
| Zhang et al., 2020                         |             |             | X                     |        |               |                         |          |                   |                    |              |              |        |          |
| Vrbičanová et al., 2020                    |             |             | X                     |        |               |                         |          |                   |                    |              |              |        |          |
| Helmer et al., 2020                        |             |             | X                     |        |               |                         |          |                   |                    |              |              |        |          |
| Perevochtchikova and Sandoval-Romero, 2020 |             |             | X                     | X      |               |                         |          |                   |                    |              |              |        |          |
| García-Díez et al., 2020                   |             |             | X                     |        |               |                         |          |                   |                    |              |              |        |          |
| Rodríguez-Morales et al., 2020             | X           |             | X                     | X      | X             |                         |          |                   |                    |              |              |        |          |
| Osseni et al., 2020                        | X           |             |                       | X      |               |                         |          |                   |                    |              |              |        |          |
| Jang-Hwan et al., 2020                     |             |             |                       |        |               |                         |          |                   |                    |              |              | X      |          |
| Constant and Taylor, 2020                  | X           |             |                       |        |               | X                       |          |                   |                    |              |              |        |          |
| Bidegain et al., 2020                      | X           |             |                       | X      |               |                         |          | X                 |                    |              |              |        |          |

[illegible]

[illegible]

[illegible]

[illegible]

| Documents               | Inter-views | Focus Group | Participatory Mapping | Survey | Online Survey | Participant Observation | Q Method | Photo Elicitation | Discourse Analysis | Free Listing | Social Media | Delphi | Workshop |
|-------------------------|-------------|-------------|-----------------------|--------|---------------|-------------------------|----------|-------------------|--------------------|--------------|--------------|--------|----------|
| Brown and Brabyn, 2012  |             |             | X                     | X      |               |                         |          |                   |                    |              |              | X      |          |
| Vilanova et al., 2012   |             |             |                       | X      |               |                         |          |                   |                    |              |              |        |          |
| Nijnik et al., 2010     |             |             |                       |        |               |                         | X        |                   |                    |              |              |        |          |
| Brown and Reed, 2009    |             |             | X                     |        |               |                         |          |                   |                    |              |              |        |          |
| Stoate and Jarju, 2008  | X           |             |                       |        |               |                         |          |                   |                    |              |              |        |          |
| Alessa et al., 2008     |             |             | X                     |        | X             |                         |          |                   |                    |              |              |        |          |
| Brown and Raymond, 2007 |             |             | X                     |        | X             |                         |          |                   |                    |              |              |        |          |
| Rönnbäck et al., 2007   | X           |             |                       |        |               |                         |          |                   |                    |              |              |        |          |
| Castillo et al., 2005   | X           |             |                       |        |               | X                       |          |                   |                    |              |              |        |          |
| Brown and Reed, 2000    |             |             |                       | X      | X             |                         |          |                   |                    |              |              |        |          |

## Supplementary Material S4

*Type and number of stakeholders involved*

| Document                        | Stakeholders                                                                                                                                                                                                              | Number of Participants |
|---------------------------------|---------------------------------------------------------------------------------------------------------------------------------------------------------------------------------------------------------------------------|------------------------|
| Baumeister et al., 2022         | Local residents                                                                                                                                                                                                           | 755                    |
| Djagoun et al., 2022            | Local residents                                                                                                                                                                                                           | 203                    |
| Lee and Youn, 2022              | Village leaders'                                                                                                                                                                                                          | 38                     |
| Caglayan et al., 2021           | University employees, General Directorate of Forestry, Non-governmental organizations (NGOs), Forestry research institutes, Media, Changers of agriculture, forest and landscape architects, Urban people, Municipalities | 19                     |
| Blanco et al., 2021             | Farmers                                                                                                                                                                                                                   | 45                     |
| Kim and Son, 2021               | Bloggers                                                                                                                                                                                                                  | 1625                   |
| Ngaji et al., 2021              | Community leaders and experts                                                                                                                                                                                             | 50                     |
| Zhi-Ying and Yeo-Chang, 2021    | Experts                                                                                                                                                                                                                   | 30                     |
| Tovar-Tique et al., 2021        | Community leaders, public officials and general local residents                                                                                                                                                           | 369                    |
| Castillo et al., 2021           | Local community, experts and government administrators                                                                                                                                                                    | 61                     |
| Chen and Akamine, 2021          | Community leaders and knowledgeable senior residents                                                                                                                                                                      | 38                     |
| Kreye et al., 2021              | Forest owners                                                                                                                                                                                                             | 14                     |
| Cifuentes-Espinosa et al., 2021 | Community leaders, farmers                                                                                                                                                                                                | 152                    |
| Reang et al., 2021              | Farm owners                                                                                                                                                                                                               | 42                     |
| Coelho-Junior et al., 2021      | Local population                                                                                                                                                                                                          | 75                     |
| Zhao et al., 2021               | Users                                                                                                                                                                                                                     | 3,019,644*             |
| Ngo et al., 2021                | Local people, healers and local government officers                                                                                                                                                                       | 25                     |
| Beckmann-Wübbelt et al., 2021   | Locals                                                                                                                                                                                                                    | 501                    |
| Breyne et al., 2021             | General public                                                                                                                                                                                                            | 1516                   |
| Chanza and Musakwa, 2021        | Indigenous                                                                                                                                                                                                                | 57                     |
| Leary et al., 2021              | Farmers                                                                                                                                                                                                                   | 29                     |
| Sieber et al., 2021             | Governmental sector; private sector; non-governmental sector; academia                                                                                                                                                    | 39                     |

| Document                                   | Stakeholders                                                                                                                                                                                                                                                                                                    | Number of Participants |
|--------------------------------------------|-----------------------------------------------------------------------------------------------------------------------------------------------------------------------------------------------------------------------------------------------------------------------------------------------------------------|------------------------|
| Suarez et al., 2021                        | Local population (laypeople, academics, civil servants)                                                                                                                                                                                                                                                         | 37                     |
| Fagerholm et al., 2021                     | Residents                                                                                                                                                                                                                                                                                                       | 730                    |
| Lin et al., 2021                           | Local residents                                                                                                                                                                                                                                                                                                 | 410                    |
| Miller et al., 2021                        | Forest-dependent communities                                                                                                                                                                                                                                                                                    | 55                     |
| Crivellaro et al., 2021                    | Public administrations; environmental NGOs, tourism promoters, and private actors of forest-wood chain                                                                                                                                                                                                          | 47                     |
| Ciesielski and Stereńczak, 2021            | Users                                                                                                                                                                                                                                                                                                           | 8821*                  |
| Grzyb et al., 2021                         | Users                                                                                                                                                                                                                                                                                                           | 17,118*                |
| Sansilvestri et al., 2021                  | Industries/companies (economic actors), institutions/associations (political actors), and private forest owners (private/citizen actors)                                                                                                                                                                        | 52                     |
| Shipley et al., 2020                       | Leaders from key agricultural and conservation organizations across the Kaskaskia River Watershed, including tourism, economic development, and planning. Professions: Farming, Conservation, Tourism, Economic Development, Biology, Academia, Engineering, Media, Teacher                                     | 38                     |
| Marta et al., 2020                         | Public administrations (municipalities, forestry, and protected area offices and agencies); environmental NGOs; tourism sector (tourism offices, guides, and guesthouse owners); private forest-wood chain actors (forest owners' associations, sawmills, and carpentries)                                      | 47                     |
| Ndayizeye et al., 2020                     | Indigenous rural population                                                                                                                                                                                                                                                                                     | 187                    |
| Singh et al., 2020                         | Women of tribal communities                                                                                                                                                                                                                                                                                     | 75                     |
| Baumeister et al., 2020                    | Locals                                                                                                                                                                                                                                                                                                          | 3354                   |
| Branca et al., 2020                        | Policy-makers, managers, sociocultural groups (cultural, environmental, leisure and recreational associations)                                                                                                                                                                                                  | 23                     |
| Blanco et al., 2020                        | Farmers                                                                                                                                                                                                                                                                                                         | 19                     |
| Zhang et al., 2020                         | Local stakeholders' (farmers, government managers/experts, and company employees)                                                                                                                                                                                                                               | 105                    |
| Vrbičanová et al., 2020                    | Municipal mayors and their deputies, scientists working in national parks and the directors of regional tourism organizations                                                                                                                                                                                   | 49                     |
| Helmer et al., 2020                        | Individuals that were familiar with the landscape, utilized the region for recreation, had a connection to the area, or had an interest in forest and range-lands management                                                                                                                                    | 612                    |
| Perevochtchikova and Sandoval-Romero, 2020 | Local population                                                                                                                                                                                                                                                                                                | 23                     |
| García-Díez et al., 2020                   | General public living in the Madrid region                                                                                                                                                                                                                                                                      | 580                    |
| Rodríguez-Morales et al., 2020             | (i) "Locals": inhabitants of the parishes owning the FCs, i.e. owners of the FCs; (ii) "neighbours": neighbours of the municipalities surrounding the SEU except the densely populated municipality of A Coruña, whose inhabitants were qualified as (iii) "urban"; and (iv) "others": visitors from elsewhere. | 244                    |

| Document                          | Stakeholders                                                                                                                                                                                                                                                                                                                                                      | Number of Participants |
|-----------------------------------|-------------------------------------------------------------------------------------------------------------------------------------------------------------------------------------------------------------------------------------------------------------------------------------------------------------------------------------------------------------------|------------------------|
| Osseni et al., 2020               | Local residents                                                                                                                                                                                                                                                                                                                                                   | 164                    |
| Jang-Hwan et al., 2020            | Professionals and government officials in the fields of forestry, landscape architecture, and urban planning                                                                                                                                                                                                                                                      | 15                     |
| Constant and Taylor, 2020         | Indigenous rural population                                                                                                                                                                                                                                                                                                                                       | 30                     |
| Bidegain et al., 2020             | Local population (farmer, fisherman, public servant, private sector, self-employed, retired, student, housewife)                                                                                                                                                                                                                                                  | 422                    |
| Bhatta et al., 2020               | District Forest Officer of Jumla district, the rangers of Rara National Park, members of the Rara National Park buffer zone management committee and community forest user groups, the customary village chief (Mukhiya) of each of the study villages, representatives from the mothers' groups (Ama Samuha), school teachers, senior citizens, and herders      | 69                     |
| Włodarczyk-Marciniak et al., 2020 | Farmers                                                                                                                                                                                                                                                                                                                                                           | 540                    |
| Escobedo et al., 2020             | Local residents                                                                                                                                                                                                                                                                                                                                                   | 51                     |
| Martín-Forés et al., 2020         | Conservation, agriculture, forestry, tourism, government agencies, local populations and other stakeholders.                                                                                                                                                                                                                                                      | 40                     |
| Schneider et al., 2020            | Foresters (municipal administration with forestry expertise and professional forest managers), representatives of nature conservation authorities (NCAs) and members of environmental NGOs AND 'others', which includes academic and research institutions, landscape engineers (environmental planners) and local municipal administration (i.e. municipalities) | 53                     |
| Pullanikkatil et al., 2020        | Forest/woodland, urban, peri-urban, agricultural farms, subsistence farms and lakeshore residents                                                                                                                                                                                                                                                                 | 154                    |
| Ge et al., 2020                   | Experts                                                                                                                                                                                                                                                                                                                                                           | 30                     |
| Ciftcioglu, 2020                  | Local population                                                                                                                                                                                                                                                                                                                                                  | 96                     |
| Alpuche-Álvarez et al., 2019      | Locals                                                                                                                                                                                                                                                                                                                                                            | 60                     |
| Berneti et al., 2019              | Users                                                                                                                                                                                                                                                                                                                                                             | 65,418*                |
| Schirpke et al., 2019             | Local people, visitors                                                                                                                                                                                                                                                                                                                                            | 967                    |
| Delgado-Aguilar et al., 2019      | Members of local communities                                                                                                                                                                                                                                                                                                                                      | 208                    |
| Vaz et al., 2019                  | Users                                                                                                                                                                                                                                                                                                                                                             | 1748*                  |
| Hong and Saizen, 2019             | Locals, experts                                                                                                                                                                                                                                                                                                                                                   | 190                    |
| Feurer et al., 2019               | Local population                                                                                                                                                                                                                                                                                                                                                  | 43                     |
| Acharya et al., 2019              | Local population, regional managers, national experts                                                                                                                                                                                                                                                                                                             | 165                    |
| Teixeira et al., 2019             | Farmers; residents and tourists                                                                                                                                                                                                                                                                                                                                   | 1645                   |

| Document                   | Stakeholders                                                                                                                                                                                                                                                                                                                                    | Number of Participants |
|----------------------------|-------------------------------------------------------------------------------------------------------------------------------------------------------------------------------------------------------------------------------------------------------------------------------------------------------------------------------------------------|------------------------|
| Lhoest et al., 2019        | Indigenous rural population                                                                                                                                                                                                                                                                                                                     | 225                    |
| Tew et al., 2019           | Local residents, people with specialist interests or hobbies (such as natural history, walking, mountain biking), forest visitors, and people who work in the forest                                                                                                                                                                            | 172                    |
| Cuni-Sanchez et al., 2019a | Indigenous rural population                                                                                                                                                                                                                                                                                                                     | 150                    |
| Lagbas, 2019               | University students                                                                                                                                                                                                                                                                                                                             | 684                    |
| Dorji et al., 2019         | Local communities, farmers and village heads; and forest experts, local foresters and senior forestry officials of the forest department who deal with conservation ecology and the management of old-growth oak forests                                                                                                                        | 84                     |
| Cuni-Sanchez et al., 2019b | Indigenous rural population                                                                                                                                                                                                                                                                                                                     | 120                    |
| Robson et al., 2019        | Local residents                                                                                                                                                                                                                                                                                                                                 | 571                    |
| do Rosário et al., 2019    | Associations, Policy makers, Academia, Other entities, Owners/managers, Enterprises, Rural workers, Environmental NGO's                                                                                                                                                                                                                         | 67                     |
| Goodwin et al., 2019       | Primary school students                                                                                                                                                                                                                                                                                                                         | 403                    |
| Raum, 2018                 | Governmental organisations; membership organisations (production)/membership organisations (conservation); corporates/businesses; private forest owners; local people/the public                                                                                                                                                                | -                      |
| Armatas et al., 2018       | Natural resource managers, planners, and scientists, ranchers, nature-based tourist operators, non-governmental organization representatives                                                                                                                                                                                                    | 96                     |
| Filyushkina et al., 2018   | Researchers                                                                                                                                                                                                                                                                                                                                     | 6                      |
| Paudyal et al., 2018       | Farmers, local business owners, job holders and social workers                                                                                                                                                                                                                                                                                  | 60                     |
| Janeczko et al., 2018      | Runners                                                                                                                                                                                                                                                                                                                                         | 640                    |
| Bremer et al., 2018        | Local community                                                                                                                                                                                                                                                                                                                                 | 13                     |
| Hough et al., 2018         | Representatives from governmental agencies (such as the US Geological Survey, the Bureau of Land Management, and Arizona State Land Department), non-governmental organizations (such as The Nature Conservancy and the Audubon Society), Fort Huachuca (a nearby military base), and local towns (such as Sierra Vista, Bisbee, and Tombstone) | 27                     |
| Mastrangelo, 2018          | Farmers                                                                                                                                                                                                                                                                                                                                         | 36                     |
| Agwu et al., 2018          | Farmers                                                                                                                                                                                                                                                                                                                                         | 60                     |
| Mero-Dowo et al., 2018     | Communal areas residents and farmers                                                                                                                                                                                                                                                                                                            | 280                    |
| Adnan, 2018                | Users                                                                                                                                                                                                                                                                                                                                           | -                      |
| Ko and Son, 2018           | Local residents                                                                                                                                                                                                                                                                                                                                 | 240                    |

| Document                       | Stakeholders                                                                                                                                                                                                                                                                                                                                                                                                                       | Number of Participants |
|--------------------------------|------------------------------------------------------------------------------------------------------------------------------------------------------------------------------------------------------------------------------------------------------------------------------------------------------------------------------------------------------------------------------------------------------------------------------------|------------------------|
| Chen et al., 2018              | Local residents                                                                                                                                                                                                                                                                                                                                                                                                                    | 1003                   |
| De Meo et al., 2018            | (a) Key stakeholders: the main actors in terms of social role and power, and who actively participate in the decision-making process; (b) Primary stakeholders: the beneficiaries of the FLMP, who are only partially involved in the decision-making process                                                                                                                                                                      | 362                    |
| Janeczko et al., 2018          | Local runners                                                                                                                                                                                                                                                                                                                                                                                                                      | 346                    |
| Melnikovych et al., 2018       | i) Forest related business representatives; ii) forestry specialists; and iii) local community representatives                                                                                                                                                                                                                                                                                                                     | 450                    |
| Tauro et al., 2018             | Cattle ranchers                                                                                                                                                                                                                                                                                                                                                                                                                    | 27                     |
| Brown et al., 2018             | Local land owners                                                                                                                                                                                                                                                                                                                                                                                                                  | 7                      |
| Delgado-Aguilar et al., 2017   | Members of local communities                                                                                                                                                                                                                                                                                                                                                                                                       | 208                    |
| Mul et al., 2017               | Local community                                                                                                                                                                                                                                                                                                                                                                                                                    | 105                    |
| Mensah et al., 2017            | Local population - heads of households                                                                                                                                                                                                                                                                                                                                                                                             | 86                     |
| Wan et al., 2017               | Forest companies' external experts                                                                                                                                                                                                                                                                                                                                                                                                 | 20                     |
| Ricaurte et al., 2017          | Experts                                                                                                                                                                                                                                                                                                                                                                                                                            | 58                     |
| Wang et al., 2017              | Locals                                                                                                                                                                                                                                                                                                                                                                                                                             | 712                    |
| Zahvoyska et al., 2017         | Scientists and forestry enterprise employees                                                                                                                                                                                                                                                                                                                                                                                       | -                      |
| Queiroz et al., 2017           | Fishermen                                                                                                                                                                                                                                                                                                                                                                                                                          | 80                     |
| Caballero-Serrano et al., 2017 | Local population -parishioners and municipal decision-makers, farmers, homemakers, educators, and local people in general                                                                                                                                                                                                                                                                                                          | 142                    |
| Graves et al., 2017            | Public forest visitors                                                                                                                                                                                                                                                                                                                                                                                                             | 293                    |
| Garrido et al., 2017           | Stake holders local and regional level; Civilian (Naturalist, Environmental NGO); Private (Landowners, Farm managers, Butcher, Beekeeper, Chief hunter, Nature guide, Farmers association, Forestry company); Public (Municipal Officials, Road Information Centre driven, Official CAP, Wildlife Care Centre, National Park Officer, Regional Officials); Public (Municipal Officials, National Park Officer, Regional Officials) | 34                     |
| Schmidt et al., 2017           | visitors and local population (Pre-identification of services - Consultative Forum including members of regional park management, Councils, private landowners and other stakeholders)                                                                                                                                                                                                                                             | 563                    |
| Smith and Ram, 2017            | Visitors                                                                                                                                                                                                                                                                                                                                                                                                                           | 876                    |
| Fagerholm et al., 2016         | Local residents                                                                                                                                                                                                                                                                                                                                                                                                                    | 219                    |
| Lupp et al., 2016              | Visitors                                                                                                                                                                                                                                                                                                                                                                                                                           | 102                    |
| Fraser et al., 2016            | Locals                                                                                                                                                                                                                                                                                                                                                                                                                             | 64                     |

| Document                       | Stakeholders                                                                                                                                                                                                                                                                                                                                                                                                                                                                                                                                                | Number of Participants |
|--------------------------------|-------------------------------------------------------------------------------------------------------------------------------------------------------------------------------------------------------------------------------------------------------------------------------------------------------------------------------------------------------------------------------------------------------------------------------------------------------------------------------------------------------------------------------------------------------------|------------------------|
| Cuni-Sanchez et al., 2016      | Local population                                                                                                                                                                                                                                                                                                                                                                                                                                                                                                                                            | 270                    |
| Zoderer et al., 2016           | Tourists                                                                                                                                                                                                                                                                                                                                                                                                                                                                                                                                                    | 470                    |
| Nijnik et al., 2016            | i) Forestry-related decision-makers, first of all the Forestry Commission, and forest owners and managers; (ii) local people such as the primary forest users; (iii) forest and environmental NGOs; (iv) forest-based industries, and (v) scientific experts in forestry and in ecosystem services of trees                                                                                                                                                                                                                                                 | 182                    |
| Briceño et al., 2016           | Researchers and relevant social actors in the use, conservation and management of the REA (representing local governments, central government, neighbourhood and communal presidents, presidents of agricultural and artisan associations, and school teachers) and local people                                                                                                                                                                                                                                                                            | 112                    |
| Sténs et al., 2016             | Conservation; Hunting and fishing; Tourism and recreation; Sami livelihoods; Biomass and bio-energy; Rural development; Cultural heritage                                                                                                                                                                                                                                                                                                                                                                                                                   | 25                     |
| Dupras et al., 2016            | Quebec-based experts in ES science familiar with forests and trees located in the urban and rural areas                                                                                                                                                                                                                                                                                                                                                                                                                                                     | 16                     |
| Nahuelhual et al., 2016        | planners from CONAF, the regional office of the National Tourism Service (SERNATUR), the municipality tourism office, the Regional Government of Los Ríos Region, and Panguipulli Model Forest; researchers from the Center for Transdisciplinary Environmental Studies and Sustainable Human Development (CEAM) of University Austral de Chile; community representatives from the Panguipulli Environmental Coalition, the Coz-Coz Indigenous Parliament, Puhuincul Community Tourism Association, and the Liquiñe's Association of Ecotourism and Guides | 14                     |
| Ramirez-Gomez et al., 2016     | Community members from the five indigenous villages                                                                                                                                                                                                                                                                                                                                                                                                                                                                                                         | 119                    |
| Pastorella et al., 2016        | Public administrations, non-governmental associations-organisations, academia and research institutes, professional associations of the forestry-wood-energy chain                                                                                                                                                                                                                                                                                                                                                                                          | 71                     |
| Maestre-Andrés et al., 2016    | Visitors                                                                                                                                                                                                                                                                                                                                                                                                                                                                                                                                                    | 200                    |
| Sonter et al., 2016            | In-state and out-of-state visitors                                                                                                                                                                                                                                                                                                                                                                                                                                                                                                                          | -                      |
| Martínez-Pastur et al., 2016   | Local people and visitors                                                                                                                                                                                                                                                                                                                                                                                                                                                                                                                                   | -                      |
| Zank et al., 2016              | Local residents                                                                                                                                                                                                                                                                                                                                                                                                                                                                                                                                             | 181                    |
| van Oort et al., 2015          | Managers and local decision makers'; locals; researchers                                                                                                                                                                                                                                                                                                                                                                                                                                                                                                    | 607                    |
| Peters et al., 2015            | Nature conservation associations; timber industries and associations, timber users, energy wood users; ministries (including forest administration); associations of forest owners, forest enterprises, foresters; scientific institutions, researchers; tourism enterprises and associations                                                                                                                                                                                                                                                               | 103                    |
| Cotee-Jones and Whitaker, 2015 | Villagers                                                                                                                                                                                                                                                                                                                                                                                                                                                                                                                                                   | 12                     |
| Thiagarajah et al., 2015       | General public and visitors                                                                                                                                                                                                                                                                                                                                                                                                                                                                                                                                 | 283                    |
| Hohenthal et al., 2015         | Experts from agriculture; conservation; fish farming; forests; tree nurseries; water; government departments and agencies; provincial administration; community-based organizations (CBOs); non-governmental organizations (NGOs); companies; scientific expert                                                                                                                                                                                                                                                                                             | 99                     |

| Document                    | Stakeholders                                                                                                                                                                                                                                                                                                                                            | Number of Participants |
|-----------------------------|---------------------------------------------------------------------------------------------------------------------------------------------------------------------------------------------------------------------------------------------------------------------------------------------------------------------------------------------------------|------------------------|
| Zank et al., 2015           | Local health experts                                                                                                                                                                                                                                                                                                                                    | 66                     |
| Ramírez and Ibarra, 2015    | Locals                                                                                                                                                                                                                                                                                                                                                  | 195                    |
| Paudyal et al., 2015        | Local community members and experts                                                                                                                                                                                                                                                                                                                     | 110                    |
| Orenstein et al., 2015      | University students, researchers and practitioners from the fields of landscape architecture, architecture, urban planning, ecology, and archeology, land use managers, high school students (including a group from a scouting organization), and residents of the communities in and around the Carmel Foest, including jewish and druze participants | 74                     |
| Esse et al., 2014           | Ministry of Environment (MMA), National Forestry Corporation (CONAF), National Fishing Service (SERNAPESCA), Ministry of Health (SEREMI SALUD), Non-Governmental Organisations (NGOs), Municipal Offices, Tourism Organisations                                                                                                                         | 25                     |
| Sarvašová et al., 2014      | Forest managers; land and/or forest owners; representatives of forest authorities; other type of stakeholders                                                                                                                                                                                                                                           | 27                     |
| O'Brien et al., 2014        | Nordic walkers group; deaf group; green gym group (environmental volunteering); morning mixed age and gender group; afternoon mixed age and gender group; jeskyns wood volunteer group. The visit took place at shorne woods not jeskyns wood.                                                                                                          | 49                     |
| Khan et al., 2014           | Indigenous people                                                                                                                                                                                                                                                                                                                                       | 120                    |
| Al-Assaf et al., 2014       | Locals                                                                                                                                                                                                                                                                                                                                                  | 300                    |
| Hendee and Flint, 2014      | Private forest landowners                                                                                                                                                                                                                                                                                                                               | 32                     |
| Bezák and Bezáková, 2014    | Expertos y de los residentes locales                                                                                                                                                                                                                                                                                                                    | 131                    |
| Bieling et al., 2014        | Residents of the study sites, visitors, and farmers                                                                                                                                                                                                                                                                                                     | 262                    |
| Muhamad et al., 2014        | Rural people                                                                                                                                                                                                                                                                                                                                            | 138                    |
| Tadesse et al., 2014        | Major indigenous groups and recent settlers                                                                                                                                                                                                                                                                                                             | 230                    |
| Ferrari and Geneletti, 2014 | Experts from local administrative offices and research institutes                                                                                                                                                                                                                                                                                       | 51                     |
| Tadesse et al., 2014        | Local residents                                                                                                                                                                                                                                                                                                                                         | 105                    |
| López-Santiago et al., 2014 | Locals and non-locals                                                                                                                                                                                                                                                                                                                                   | 314                    |
| Boykin et al., 2013         | Federal and state agencies and nongovernmental organization                                                                                                                                                                                                                                                                                             | -                      |
| Meyfroidt, 2013             | Locals                                                                                                                                                                                                                                                                                                                                                  | 37                     |
| Kang et al., 2013           | Residents                                                                                                                                                                                                                                                                                                                                               | -                      |
| Gao et al., 2013            | Local residents                                                                                                                                                                                                                                                                                                                                         | 152                    |
| Gilmore et al., 2013        | Community leaders and cultural specialists                                                                                                                                                                                                                                                                                                              | 36                     |

| Document                | Stakeholders                                                                                                                  | Number of Participants |
|-------------------------|-------------------------------------------------------------------------------------------------------------------------------|------------------------|
| Brown and Brabyn, 2012  | General public                                                                                                                | 608                    |
| Vilanova et al., 2012   | Local communities (both indigenous and native groups) living within the area and workers and managers of the timber companies | 44                     |
| Nijnik et al., 2010     | Forestry, land use, nature conservation, and environmental issues (both academics and practitioners)                          | 66                     |
| Brown and Reed, 2009    | Visitors                                                                                                                      | 579                    |
| Stoate and Jarju, 2008  | Farmers                                                                                                                       | 29                     |
| Alessa et al., 2008     | Residents                                                                                                                     | 531                    |
| Brown and Raymond, 2007 | Locals and visitors                                                                                                           | 2100                   |
| Rönnbäck et al., 2007   | Resource users (PLUS two licensees, one ranger, two researchers and the Kwale District Forestry Officer)                      | 48                     |
| Castillo et al., 2005   | Local people                                                                                                                  | 150                    |
| Brown and Reed, 2000    | General public                                                                                                                | 2766                   |

\*resources extracted from online media (photos, posts, keywords, etc.)

## Supplementary Material S5

*Ecosystem service category valuated by document*

| Documents                       | Provisioning | Regulating | Cultural | Supporting |
|---------------------------------|--------------|------------|----------|------------|
| Baumeister et al., 2022         |              |            | X        |            |
| Djagoun et al., 2022            | X            | X          | X        | X          |
| Lee and Youn, 2022              | X            | X          | X        |            |
| Caglayan et al., 2021           | X            | X          | X        |            |
| Blanco et al., 2021             | X            | X          | X        |            |
| Kim and Son, 2021               |              |            | X        |            |
| Ngaji et al., 2021              |              | X          | X        |            |
| Zhi-Ying and Yeo-Chang, 2021    | X            | X          | X        |            |
| Tovar-Tique et al., 2021        | X            | X          | X        |            |
| Castillo et al., 2021           | X            | X          | X        |            |
| Chen and Akamine, 2021          | X            | X          | X        | X          |
| Kreye et al., 2021              | X            | X          |          |            |
| Cifuentes-Espinosa et al., 2021 | X            | X          | X        | X          |
| Reang et al., 2021              | X            | X          | X        | X          |
| Coelho-Junior et al., 2021      | X            | X          | X        | X          |
| Zhao et al., 2021               |              |            | X        |            |
| Ngo et al., 2021                |              |            | X        |            |
| Beckmann-Wübbelt et al., 2021   |              |            | X        |            |
| Breyne et al., 2021             |              |            | X        |            |
| Chanza and Musakwa, 2021        | X            | X          | X        |            |
| Leary et al., 2021              | X            | X          | X        | X          |
| Sieber et al., 2021             | X            | X          | X        |            |
| Suarez et al., 2021             |              | X          |          |            |
| Fagerholm et al., 2021          |              |            | X        |            |
| Lin et al., 2021                | X            | X          | X        |            |
| Miller et al., 2021             | X            |            |          |            |
| Crivellaro et al., 2021         | X            | X          | X        | X          |
| Ciesielski and Stereńczak, 2021 |              |            | X        |            |
| Grzyb et al., 2021              |              |            | X        |            |
| Sansilvestri et al., 2021       | X            | X          | X        | X          |
| Shipley et al., 2020            | X            |            | X        | X          |
| Marta et al., 2020              | X            | X          | X        | X          |
| Ndayizeye et al., 2020          | X            | X          | X        | X          |
| Singh et al., 2020              | X            |            | X        |            |
| Baumeister et al., 2020         |              |            | X        |            |
| Branca et al., 2020             |              |            | X        |            |
| Blanco et al., 2020             | X            | X          | X        |            |
| Zhang et al., 2020              | X            | X          | X        |            |
| Vrbičanová et al., 2020         |              |            | X        |            |

| Documents                                  | Provisioning | Regulating | Cultural | Supporting |
|--------------------------------------------|--------------|------------|----------|------------|
| Helmer et al., 2020                        |              |            | X        |            |
| Perevochtchikova and Sandoval-Romero, 2020 |              | X          |          |            |
| García-Díez et al., 2020                   |              |            | X        |            |
| Rodríguez-Morales et al., 2020             | X            | X          | X        |            |
| Osseni et al., 2020                        | X            | X          | X        |            |
| Jang-Hwan et al., 2020                     | X            | X          | X        |            |
| Constant and Taylor, 2020                  | X            | X          | X        |            |
| Bidegain et al., 2020                      | X            | X          | X        |            |
| Bhatta et al., 2020                        | X            |            | X        |            |
| Włodarczyk-Marciniak et al., 2020          | X            | X          | X        |            |
| Escobedo et al., 2020                      |              | X          | X        |            |
| Martín-Forés et al., 2020                  |              |            | X        |            |
| Schneider et al., 2020                     | X            |            | X        | X          |
| Pullanikkatil et al., 2020                 | X            |            |          |            |
| Ge et al., 2020                            |              | X          | X        | X          |
| Ciftcioglu, 2020                           | X            | X          | X        |            |
| Alpuche-Álvarez et al., 2019               | X            | X          | X        |            |
| Bernetti et al., 2019                      |              |            | X        |            |
| Schirpke et al., 2019                      |              |            | X        |            |
| Delgado-Aguilar et al., 2019               | X            |            | X        |            |
| Vaz et al., 2019                           |              |            | X        |            |
| Hong and Saizen, 2019                      | X            |            | X        |            |
| Feurer et al., 2019                        | X            | X          | X        |            |
| Acharya et al., 2019                       | X            | X          | X        |            |
| Teixeira et al., 2019                      | X            | X          | X        |            |
| Lhoest et al., 2019                        | X            | X          | X        |            |
| Tew et al., 2019                           |              |            | X        |            |
| Cuni-Sanchez et al., 2019a                 | X            | X          | X        | X          |
| Lagbas, 2019                               |              | X          | X        |            |
| Dorji et al., 2019                         | X            | X          | X        | X          |
| Cuni-Sanchez et al., 2019b                 | X            | X          | X        |            |
| Robson et al., 2019                        | X            | X          | X        |            |
| do Rosário et al., 2019                    | X            | X          | X        |            |
| Goodwin et al., 2019                       |              |            | X        |            |
| Raum, 2018                                 | X            | X          | X        |            |
| Armatas et al., 2018                       | X            | X          | X        |            |
| Filyushkina et al., 2018                   |              |            |          | X          |
| Paudyal et al., 2018                       | X            | X          | X        | X          |

| Documents                      | Provisioning | Regulating | Cultural | Supporting |
|--------------------------------|--------------|------------|----------|------------|
| Janeczko et al., 2018          |              |            | X        |            |
| Bremer et al., 2018            |              |            | X        |            |
| Hough et al., 2018             |              | X          | X        | X          |
| Mastrangelo, 2018              | X            | X          |          |            |
| Agwu et al., 2018              | X            |            | X        |            |
| Mero-Dowo et al., 2018         | X            |            |          |            |
| Adnan, 2018                    |              |            | X        |            |
| Ko and Son, 2018               |              |            | X        |            |
| Chen et al., 2018              |              | X          | X        |            |
| De Meo et al., 2018            | X            | X          | X        |            |
| Janeczko et al., 2018          |              |            | X        |            |
| Melnykovich et al., 2018       | X            | X          | X        | X          |
| Tauro et al., 2018             | X            | X          | X        | X          |
| Brown et al., 2018             |              | X          | X        |            |
| Delgado-Aguilar et al., 2017   | X            |            | X        |            |
| Mul et al., 2017               | X            |            |          | X          |
| Mensah et al., 2017            | X            | X          | X        | X          |
| Wan et al., 2017               | X            | X          |          |            |
| Ricaurte et al., 2017          | X            | X          | X        |            |
| Wang et al., 2017              | X            | X          | X        |            |
| Zahvoyska et al., 2017         | X            | X          | X        |            |
| Queiroz et al., 2017           | X            | X          | X        | X          |
| Caballero-Serrano et al., 2017 | X            | X          | X        |            |
| Graves et al., 2017            |              |            | X        |            |
| Garrido et al., 2017           | X            | X          | X        | X          |
| Schmidt et al., 2017           | X            | X          | X        |            |
| Smith and Ram, 2017            |              |            | X        |            |
| Fagerholm et al., 2016         | X            | X          | X        | X          |
| Lupp et al., 2016              |              |            | X        |            |
| Fraser et al., 2016            |              | X          |          |            |
| Cuni-Sanchez et al., 2016      | X            | X          | X        | X          |
| Zoderer et al., 2016           | X            | X          | X        |            |
| Nijnik et al., 2016            | X            | X          | X        | X          |
| Briceño et al., 2016           | X            | X          | X        |            |
| Sténs et al., 2016             | X            | X          | X        |            |
| Dupras et al., 2016            | X            | X          | X        | X          |
| Nahuelhual et al., 2016        |              |            | X        |            |
| Ramirez-Gomez et al., 2016     | X            |            | X        |            |
| Pastorella et al., 2016        | X            | X          | X        | X          |
| Maestre-Andrés et al., 2016    | X            | X          | X        | X          |

| Documents                      | Provisioning | Regulating | Cultural | Supporting |
|--------------------------------|--------------|------------|----------|------------|
| Sonter et al., 2016            |              |            | X        |            |
| Martínez-Pastur et al., 2016   |              |            | X        |            |
| Zank et al., 2016              | X            | X          | X        |            |
| van Oort et al., 2015          | X            |            |          |            |
| Peters et al., 2015            | X            | X          | X        | X          |
| Cotee-Jones and Whitaker, 2015 | X            | X          | X        |            |
| Thiagarajah et al., 2015       |              |            | X        |            |
| Hohenthal et al., 2015         | X            | X          |          |            |
| Zank et al., 2015              | X            |            | X        |            |
| Ramírez and Ibarra, 2015       | X            | X          | X        | X          |
| Paudyal et al., 2015           | X            | X          | X        | X          |
| Orenstein et al., 2015         |              |            | X        |            |
| Esse et al., 2014              | X            | X          | X        |            |
| Sarvašová et al., 2014         | X            | X          | X        |            |
| O'Brien et al., 2014           |              |            | X        |            |
| Khan et al., 2014              | X            | X          | X        |            |
| Al-Assaf et al., 2014          | X            | X          | X        |            |
| Hendee and Flint, 2014         |              |            | X        |            |
| Bezák and Bezáková, 2014       | X            | X          | X        | X          |
| Bieling et al., 2014           | X            | X          | X        |            |
| Muhamad et al., 2014           | X            | X          | X        | X          |
| Tadesse et al., 2014           | X            | X          | X        | X          |
| Ferrari and Geneletti, 2014    | X            | X          | X        |            |
| Tadesse et al., 2014           | X            | X          | X        |            |
| López-Santiago et al., 2014    | X            | X          | X        |            |
| Boykin et al., 2013            |              | X          |          |            |
| Meyfroidt, 2013                | X            | X          | X        |            |
| Kang et al., 2013              | X            | X          | X        |            |
| Gao et al., 2013               | X            | X          | X        |            |
| Gilmore et al., 2013           | X            |            |          |            |
| Brown and Brabyn, 2012         |              |            | X        |            |
| Vilanova et al., 2012          | X            | X          | X        |            |
| Nijnik et al., 2010            | X            | X          | X        |            |
| Brown and Reed, 2009           |              |            | X        |            |
| Stoate and Jarju, 2008         | X            |            | X        |            |
| Alessa et al., 2008            |              |            | X        |            |
| Brown and Raymond, 2007        |              |            | X        |            |
| Rönnbäck et al., 2007          | X            | X          | X        |            |
| Castillo et al., 2005          | X            | X          | X        |            |
| Brown and Reed, 2000           |              |            | X        |            |

## Supplementary Material S6

*Ecosystem service valuated by category*

| Service Category | Services Valuated                                                                                                                                                                                                                                                                                                                                                                                                                                                                                                                                                |
|------------------|------------------------------------------------------------------------------------------------------------------------------------------------------------------------------------------------------------------------------------------------------------------------------------------------------------------------------------------------------------------------------------------------------------------------------------------------------------------------------------------------------------------------------------------------------------------|
| PROVISIONING     | Food Production; Means Of Livelihood; Place to Live; Genetic Materials/Pool; Grazing; Livestock/Aquaculture; Honey; Seed Provisioning; Materials (NWFP); Wild Plants/Animals; Shade; Timber; Fruit; Energy; Firewood/Fuelwood; Fodder; Medicinal Plants; Thermal (Medicinal) Waters; Feed and Habitat for Domestic Animals; Shelter; Water Provision; Mascot Provision and Maintenance.                                                                                                                                                                          |
| REGULATING       | Water Protection/Purification/Regulation/Quality; Climate Change Mitigation; Hazard Protection; Disease Control; Erosion Control/Protection; Air Purification/Quality; Shelter Effect for Farmed Animals; Climate Regulation (Micro-Global); Pollination; Seed Dispersal; Carbon Storage/Sequestration; Soil Protection; Soil Fertility; Soil Moisture Maintenance; Physical Soil Decomposition; Habitat for Biodiversity; Decomposition of Plant Residues; Biodiversity/Maintenance of Local Flora and Fauna; Bioremediation; Biological Control.               |
| CULTURAL         | Recreation/Ecotourism; Economic Support/Income Generation; Rural Development; Spiritual/Religious; Hunting/Fishing; Cultural Identity/Cultural Heritage; Local Knowledge; Existence; Landscape Conservation; Aesthetic; Self Knowledge/Identity; Health; Relax; Hiking, Walking, Sporting; Sense Of Place; Silence; Education/Inspiration; Harvesting; Scientific; Social Relationship; Symbolic/Mythical; Experimental; Body, Mind and Spirit Connection; Subsistence Values; Legacy/Bequest; Enhancing Natural Capital; Happiness/Enjoyment; Ecological Values |
| SUPPORTING       | Habitat Provisioning/Protection; Lifecycle Maintenance; Soil Formation; Biodiversity; Maintenance Of Nursery Population And Habitat; Primary Production; Photosynthesis; Nutrients Cycling; Disease Control; Conectivity; Rain Flow/Interaction                                                                                                                                                                                                                                                                                                                  |
